# Supplementary material for: Ionic liquid-facilitated synthesis and catalytic activity of highly dispersed Ag nanoclusters supported on TiO2
Source: Royal Society of Chemistry journal article supplement (doi:10.1039/b910610c), 2009-01-01
Supplement: b910610c.pdf [file b910610c.pdf]

Supplementary Material (ESI) for

## Ionic liquids-facilitated synthesis and catalytic activity of highly dispersed Ag nanoclusters supported by TiO<sub>2</sub>

*Huanjun Zhang, Xinyong Li and Guohua Chen\**

Department of Chemical and Biomolecular Engineering, the Hong Kong University of Science and Technology, Clear Water Bay, Kowloon, Hong Kong, China

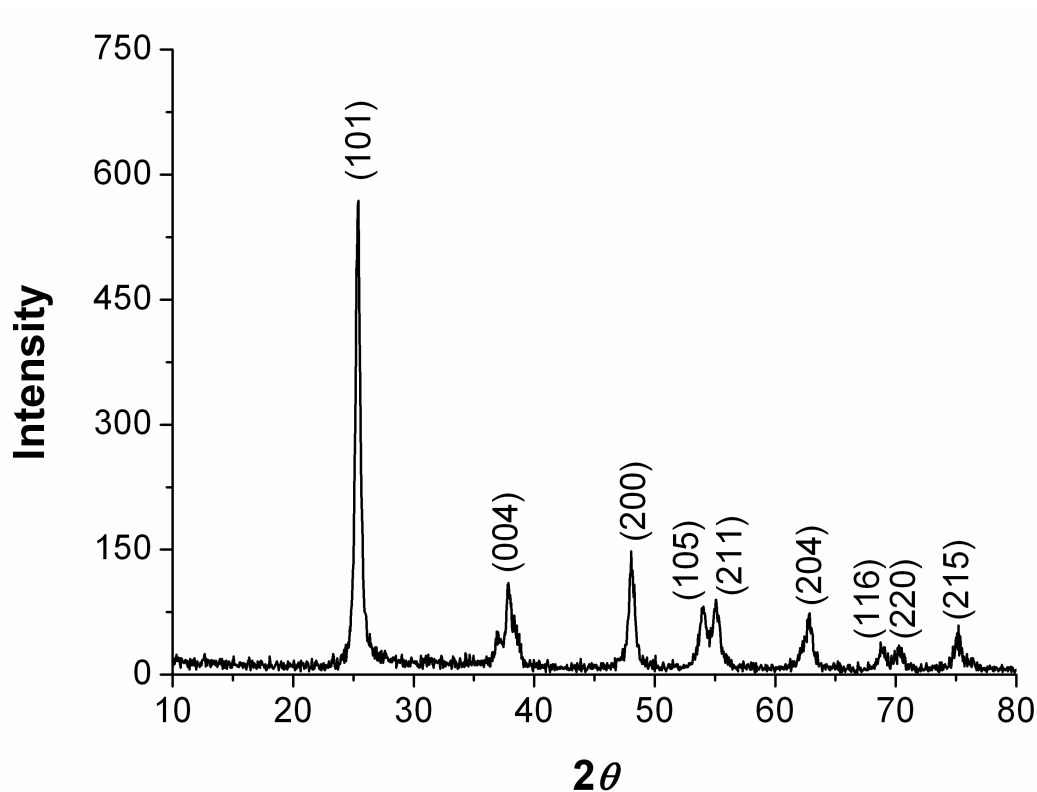

**Fig. S1** Powder XRD results of the as-synthesized Ag/TiO<sub>2</sub> particles indicating that TiO<sub>2</sub> exists in the anatase form (ICDD-JCPDS #21-1272).

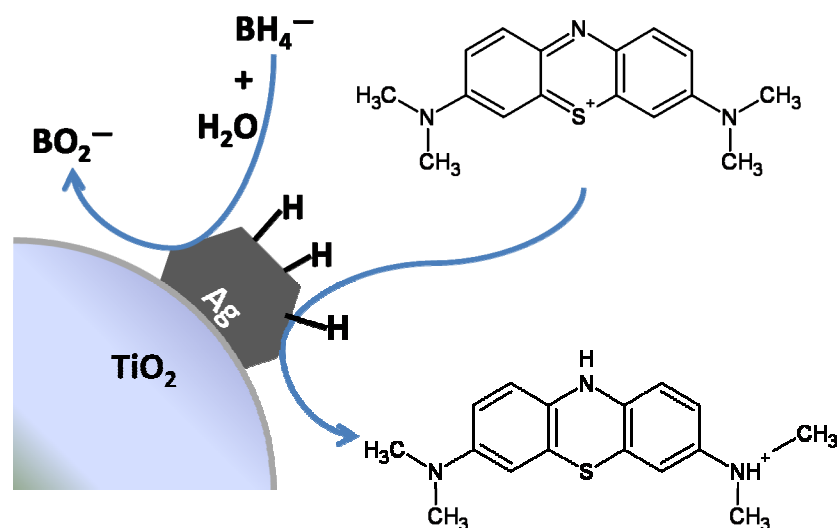

**Scheme S1.** Postulated reaction pathways of methylene blue (MB) reduction catalyzed by Ag nanoclusters supported on TiO<sub>2</sub>. Hydrogen species liberated from BH<sub>4</sub><sup>-</sup> react with MB on the surface of Ag clusters.

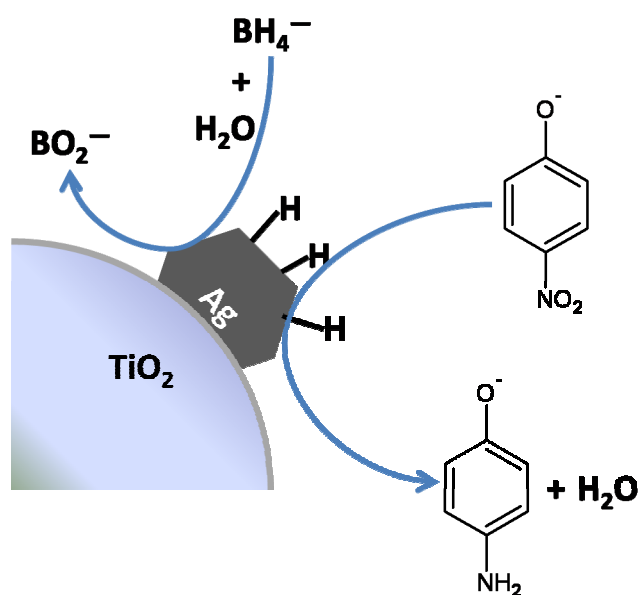

**Scheme S2.** Postulated reaction pathways of 4-nitrophenol (4-NP) reduction catalyzed by TiO<sub>2</sub>-supported Ag nanoclusters. Surface hydrogen species generated from BH<sub>4</sub><sup>-</sup> reduces 4-NP ions to form 4-aminophenolate ions.
